# Supplementary material for: Comparison of different techniques for prehospital cervical spine immobilization: Biomechanical measurements with a wireless motion capture system
Source: PLoS One. 2023 Nov 28;18(11):e0292300. doi: 10.1371/journal.pone.0292300 (PMC10683997; doi:10.1371/journal.pone.0292300)
Supplement: S7 Dataset — (XLSX) [file pone.0292300.s012.xlsx]

## Sheet: S7 Dataset
	Time marker
	Start	M0	M1	M2	M3
P1S0-001	2000		12120	28892	32990
P1S0-002	400		12272	32487	36340
P1S0-003	2240		10084	40600	46943
P1S0-004	0		17085	39341	43300
P1S0-005	250		18600	35782	38745
P1S0-006	760		12899	30871	34562
P1S0-007	1900		10877	35254	43974
P1S0-008	1700		8626	33647	36900
P1S0-009	1200		15901	37400	40928
P1S1-001	600	5910	14944	32473	34900
P1S1-002	150	5567	17555	39088	44238
P1S1-003	780	9757	20194	38111	43579
P1S1-004	1300	5113	23525	39123	42634
P1S1-005	380	5054	16224	32123	35168
P1S1-006	550	5079	13709	28793	32000
P1S1-007	700	3847	11718	25197	28680
P1S1-008	730	4827	21106	42759	45773
P1S1-009	400	6473	20110	37660	42154
P2S0-001	700		35777	50052	54318
P2S0-002	1700		58702	75743	82040
P2S0-003	800		37657	46225	50812
P2S0-004	1700		48549	68513	72900
P2S0-005	2600		42559	50364	53949
P2S0-006	970		46355	57907	60590
P2S0-007	1000		77828	91633	96872
P2S0-008	500		45917	57615	63085
P2S0-009	1400		81854	98544	101772
P2S1-001	550	5173	33060	43263	48200
P2S1-002	1200	10319	47661	65498	71208
P2S1-003	1500	5592	51402	57252	61276
P2S1-004	1100	8924	53049	64060	68206
P2S1-005	570	4095	50162	57971	61737
P2S1-006	1200	5815	47278	56340	61000
P2S1-007	150	4931	84114	102427	108024
P2S1-008	1100	6128	62878	89220	92156
P2S1-009	600	5668	78321	94873	101784
P3S0-001	800		44477	58501	62100
P3S0-002	700		78142	100699	104332
P3S0-003	40		47655	60779	64424
P3S0-004	1500		64862	90038	93428
P3S0-005	600		75893	89979	93172
P3S0-006	1100		67303	80418	83252
P3S0-007	1400		65963	91046	93644
P3S0-008	1000		71554	99023	102503
P3S0-009	2700		48103	73583	75800
P3S1-001	900	7457	50972	64379	67790
P3S1-002	0	2000	77870	103072	110490
P3S1-003	410	5114	52955	67092	71006
P3S1-004	1250	11070	83237	102635	108937
P3S1-005	500	4575	65897	78799	83687
P3S1-006	1100	4923	68305	87755	90487
P3S1-007	1480	6892	98850	116461	119994
P3S1-008	390	5221	45192	61981	65202
P3S1-009	1450	10148	86461	111394	114270
